# Supplementary material
Source: publisher figshare collection journal article supplement (https://frontiersin.figshare.com/ndownloader/files/13812608)
Supplement: Supplementary file [file 13812608]

Example 1. Self-generation prompt.

### Experiment Plan and Outline

Try to come up with an experiment that you can use to test Ellie's hypothesis.  
As part of this, mark down your initial thoughts.

[4 min]

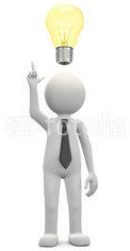

#### My initial thoughts

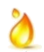

What will be tested: The influence of \_\_\_\_\_ on water fleas' behavior will be tested.

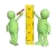

What will be measured: The influence on behavior can be observed/measured when the water fleas do the following: \_\_\_\_\_

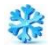

What controls will be made: We will control in the following way for whether the behavior was actually triggered by the test variable:  
\_\_\_\_\_

Example 2. Self-generation prompts in a cloze section.

[10 min]

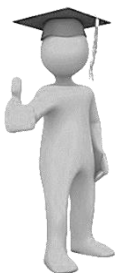

#### I learned the following things about experimentation:

In our experiment, we investigated the influence of \_\_\_\_\_ on water fleas' behavior (test dimension). We \_\_\_\_\_ for whether their behavior was actually triggered by the light by providing the water fleas with a \_\_\_\_\_ and a \_\_\_\_\_ area. The size of the two areas was \_\_\_\_\_.

...

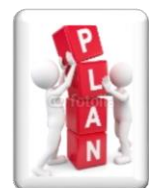

Example 3. Feedback given by the supervisor.

### Initial thoughts

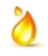

Test dimension:

The influence of light on water fleas' behavior will be tested.

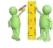

Measurement dimension:

The influence on behavior can be observed/measured when the water fleas do the following: They migrate away from the light.

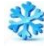

Control approach:

We will control in the following way for whether the behavior was actually triggered by the test variable: The water fleas can choose between a light area and a dark area of the same size.

What was filled in incorrectly? How often? How?

|            | Test dimension | Measurement dimension | Control approach |
|------------|----------------|-----------------------|------------------|
| What?      |                |                       |                  |
| How often? |                |                       |                  |
| How?       |                |                       |                  |

*Example 4. Feedback.*

|                                                                        |
|------------------------------------------------------------------------|
| <p><b>Mistakes observed in planning/conducting the experiment:</b></p> |
|------------------------------------------------------------------------|

- |   |    |
|---|----|
| ● | .. |
| ● | .. |
| ● | .. |
| ● | .. |
| ● | .. |

### Looking back on the experiment: Discussion of individual confounding factors

## HUNGER:

If only some of the animals are fed, they can behave differently. Hungry water fleas swim towards light, while the others swim towards darkness.

### Areas of the SAME SIZE:

These should be held constant in order to unequivocally determine whether it is actually light that is triggering the water fleas' behavior and not the size of the light area. They might also swim towards darkness because they feel constricted when provided with a small light area (*or vice versa*).

**MULTIPLE test animals:**

The more test animals considered, the more likely it is that the results of the experiment did not arise purely by chance.

**LED:**

If a flashlight is used, it is impossible to know in the end whether the light or the warmth of the flashlight influenced the water fleas' behavior!

**Discussion following the experiment:**

- [illegible]
